# Supplementary material for: Unveiling CXCR2 as a promising therapeutic target in renal cell carcinoma: exploring the immunotherapeutic paradigm shift through its inhibition by RCT001
Source: PubMed Central journal article supplement (PMC10949812; doi:10.1186/s13046-024-02984-2), 2024-03-19

## Our cohort

| Under TKI first line<br>N=100 |      | PFS TKI (months) | P value  | OS TKI (months) | P value  |
|-------------------------------|------|------------------|----------|-----------------|----------|
| CXCL1                         | low  | 9                | P=0.0418 | 32              | P=0.0409 |
|                               | high | 3                |          | 18              |          |
| CXCL2                         | low  | 8                | P=ns     | 32              | P=0.08   |
|                               | high | 6                |          | 23              |          |
| CXCL3                         | low  | 8                | P=ns     | 32              | P=ns     |
|                               | high | 7                |          | 30              |          |
| CXCL5                         | low  | 10               | P=0.0003 | 38              | P=0.0046 |
|                               | high | 3                |          | 25              |          |
| CXCL7                         | low  | 10               | P=0.008  | 37              | P=ns     |
|                               | high | 3                |          | 23              |          |
| CXCL8                         | low  | 8                | P=ns     | 34              | P=0.0235 |
|                               | high | 4                |          | 18              |          |

### Supplementary Table S1

|               | <b>Forward</b>              | <b>Reverse</b>              |
|---------------|-----------------------------|-----------------------------|
| <b>CCL17</b>  | 5' TTCCCCTTAGAAAGCTGAAG     | 5' CTTCACTCTCTTGTTGTTGG     |
| <b>CCL18</b>  | 5' CTATACCTCCTGGCAGATTC     | 5' CTCTCTTGGTTAGGAGGATG     |
| <b>CCL20</b>  | 5' TATATTGTGCGTCTCCTCAG     | 5' GCTATGTCCAATTCCATTCC     |
| <b>CCL23</b>  | 5' TGGAGAGTTACTTTGAAACG     | 5' ACAAGTTCAATTCTTCCTGG     |
| <b>CCL24</b>  | 5' TAGTAACCAGCCTTCTGTTC     | 5' CTCAGGAATTCTCTTGAAAC     |
| <b>CXCL1</b>  | 5' ATGCTGAACAGTGACAAATC     | 5' TCTTCTGTTCCCTATAAGGGC    |
| <b>CXCL11</b> | 5' CTACAGTTGTTCAAGGCTTC     | 5' CACTTTCCTGCTTTTACCC      |
| <b>CXCL5</b>  | 5' GATGAGTACAAAAGTCCTGATCCA | 5' CTGCAGCCACTGGTTCTGT      |
| <b>CXCL8</b>  | 5' GTTTTTGAAGAGGGCTGAG      | 5' TTTGCTTGAAGTTTCACTGG     |
| <b>CXCR2</b>  | 5' CCAGTCAGGATTTAAGTTTACC   | 5' GTTGATTTCCAGGGATTCTG     |
| <b>IL-1a</b>  | 5' AGAGGAAGAAATCATCAAGC     | 5' TTATACTTTGATTGAGGGCG     |
| <b>mCCL17</b> | 5' CATTCCCTATCAGGAAGTTGG    | 5' CAGTCAGAAACACGATGG       |
| <b>mCCL22</b> | 5' CACATAACATCATGGCTACC     | 5' CAGAAGAACTCCTTCACTAAAC   |
| <b>mCXCR2</b> | 5' CTA CTGCAGGATTAAGTTTACC  | 5' GACGTATATTACAACCACAGC    |
| <b>mPD-L1</b> | 5' CAAGTGAGAATGCTAGATGTG    | 5' TCCATCTTGAGTCTTTGGAC     |
| <b>PD-L1</b>  | 5'-ATGCCCCATACAACAAAATC     | 5'-GACATGTCAGTTCATGTTTCAG   |
| <b>TIMP3</b>  | 5' CATGTGCAGTACATCCATAC     | 5' AGGTGATACCGATAGTTTCAG    |
| <b>VEFGA</b>  | 5' TTTCTGCTGTCTTGGGTGCATTGG | 5' ACCACTTCGTGATGATTCTGCCCT |

**Supplementary Table S2**

|                  | <b>Panel</b> | <b>Channel</b>      | <b>Suppliers</b> | <b>References</b> |
|------------------|--------------|---------------------|------------------|-------------------|
| <b>CD107</b>     | 1            | FITC                | Biolegend        | 121605            |
| <b>CD11b</b>     | 2            | BV605               | Biolegend        | 101257            |
| <b>CD11c</b>     | 2            | BV785               | Biolegend        | 117335            |
| <b>CD163</b>     | 2            | PE-eFluor 610       | Invitrogen       | 61-1631-80        |
| <b>CD19</b>      | 1            | PE-CY7              | Biolegend        | 104511            |
| <b>CD3</b>       | 1            | PercP-Cy5.5         | Biolegend        | 100217            |
| <b>CD4</b>       | 1            | PE                  | BD               | 553730            |
| <b>CD45</b>      | 1 & 2        | AF700               | Biolegend        | 103128            |
| <b>CD69</b>      | 1            | PE-CY7              | Biolegend        | 104511            |
| <b>CD8</b>       | 1            | BV605               | Biolegend        | 100743            |
| <b>F4/80</b>     | 2            | PE-Vio770           | Miltenyi         | 130-118-459       |
| <b>Ly6C</b>      | 2            | APC-Vio770          | Miltenyi         | 130-111-919       |
| <b>Ly6G</b>      | 2            | PerCP-Vio700        | Miltenyi         | 130-117-500       |
| <b>MCHII</b>     | 2            | VioBlue             | Miltenyi         | 130-112-394       |
| <b>NK1.1</b>     | 1            | APC                 | Biolegend        | 108709            |
| <b>Viability</b> | 1 & 2        | 405/520 Fixable Dye | Miltenyi         | 130-110-206       |

**Supplementary Table S3**

## Our cohort

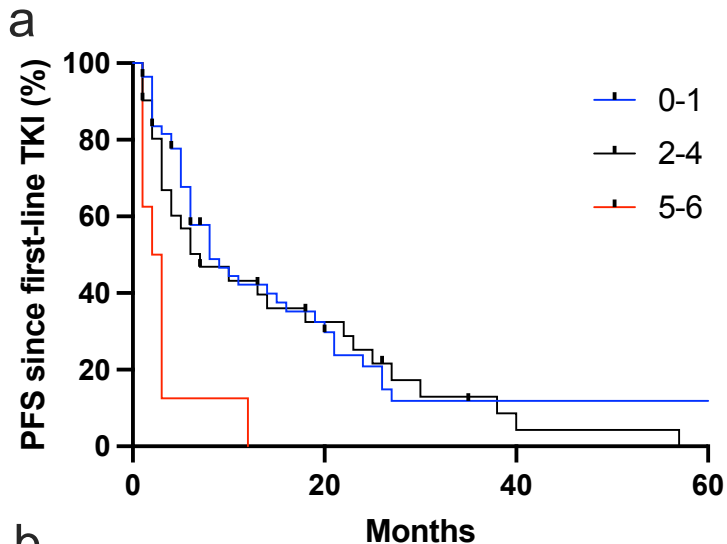

| Under TKI<br>N=98                                            | score | PFS<br>(months) | P value  |
|--------------------------------------------------------------|-------|-----------------|----------|
| CXCL1 +<br>CXCL2 +<br>CXCL3 +<br>CXCL5 +<br>CXCL7 +<br>CXCL8 | 0     | 8               | P=0.0097 |
|                                                              | 2-4   | 7               |          |
|                                                              | 5-6   | 2.5             |          |

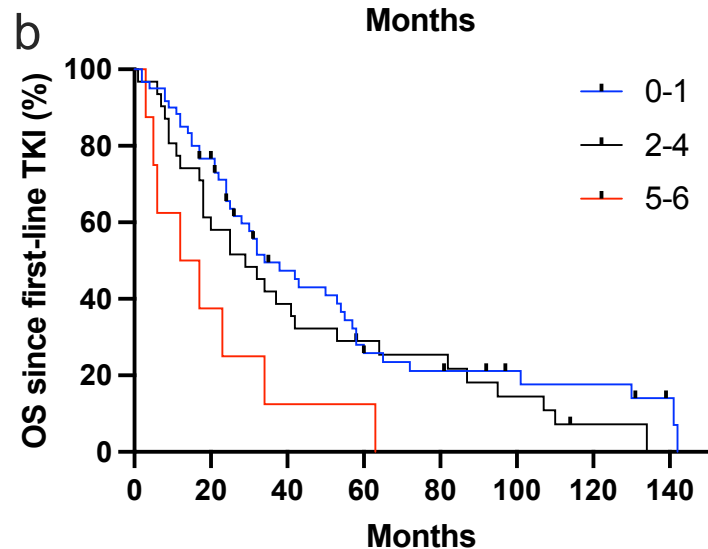

| Under TKI<br>N=98                                            | score | OS<br>(months) | P value  |
|--------------------------------------------------------------|-------|----------------|----------|
| CXCL1 +<br>CXCL2 +<br>CXCL3 +<br>CXCL5 +<br>CXCL7 +<br>CXCL8 | 0     | 34             | P=0.0172 |
|                                                              | 2-4   | 29             |          |
|                                                              | 5-6   | 14.5           |          |

RCT001 was synthesized by adapting the already described procedure (Grytsai et al, in revision) on a 250 mmol scale. Under these conditions, 81.45 g (85% yield) of product could be obtained, with a >99.9% HPLC purity.

**<sup>1</sup>H NMR (400 MHz, DMSO-*d*<sub>6</sub>):** δ 11.76 (s, 1H, H-10), 9.62 (s, 1H, H-12), 8.97 (s, 1H, H-6), 8.26 (dd, *J* = 8.9, 2.4 Hz, 1H, H-2), 7.77 (d, *J* = 8.8 Hz, 1H, H-3), 7.65 (s, 2H, H-15, H-19), 7.28 (t, *J* = 1.9 Hz, 1H, H-17).

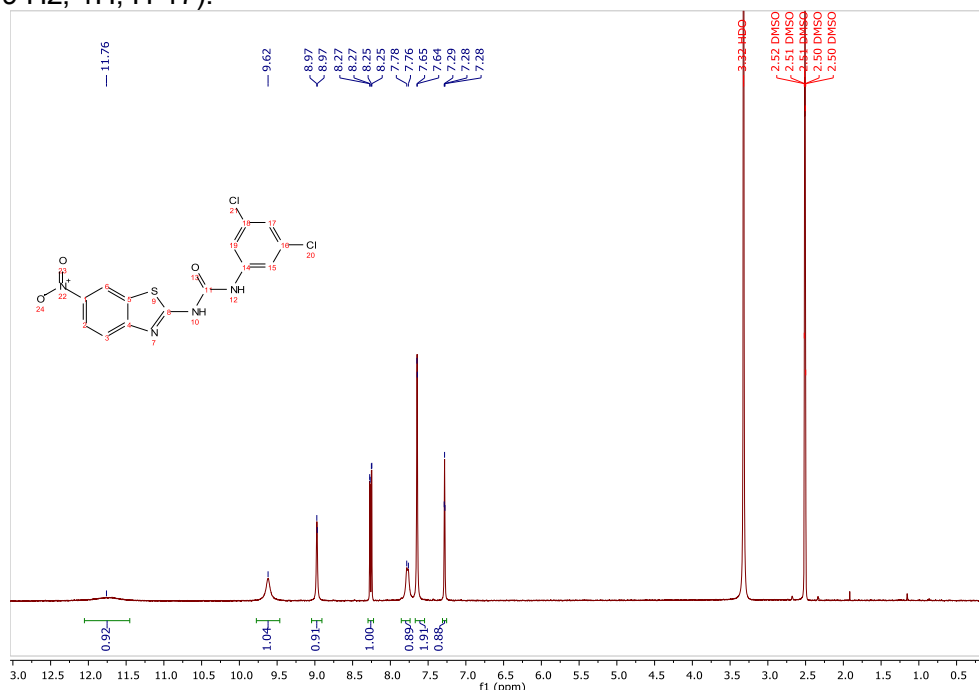

**HPLC ( $\lambda_{254}$ ):** HPLC analysis on a JASCO PU-2089/AS4050 apparatus with a Supelco analytical column Ascentis Express C18, 10 cm × 4.6 mm, 5 μm, employing the flowing method: 50% B for 3 min, 50% B to 95% B over 2 min, 95% B for 10 min then from 95% B to 50% B over 2 min, 50% B for 3 min (total time: 20 min). Flow: 1 mL/min. Solvent A: water with 0.1% formic acid. Solvent B: acetonitrile with 0.1% formic acid.

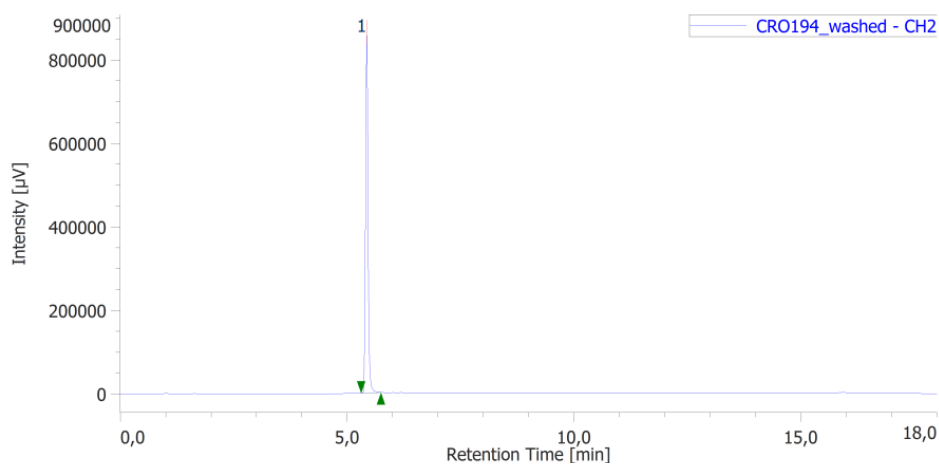

| # | Peak Name | CH | tR [min] | Area [μV·sec] | Height [μV] | Area%   | Height% | Quantity | NTP   | Resolution | Symmetry Factor | Warning |
|---|-----------|----|----------|---------------|-------------|---------|---------|----------|-------|------------|-----------------|---------|
| 1 | Unknown   | 2  | 5.433    | 3293089       | 862920      | 100.000 | 100.000 | N/A      | 49035 | N/A        | 1.055           |         |

**Supplementary Figure S2**

**a** CXCR2 activity kinetics with CXCL1 and RCT001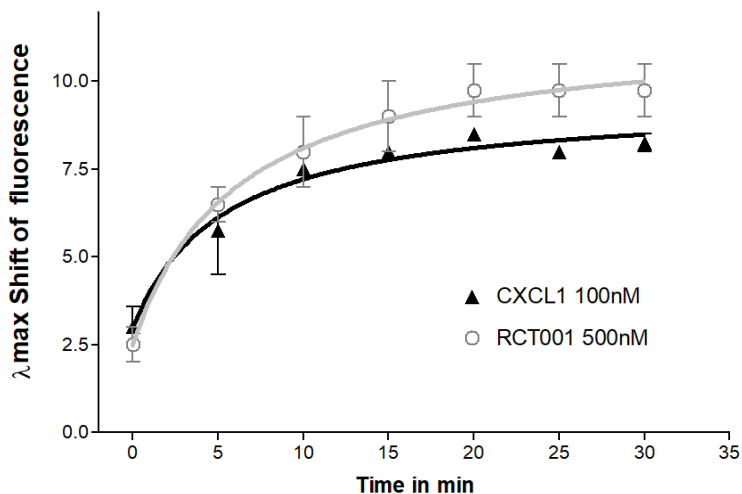

|                             | <b>CXCL1</b> | <b>RCT001</b> |
|-----------------------------|--------------|---------------|
| $\lambda_{\text{max}}$ (nm) | 6.50         | 8.38          |
| KD (min)                    | 5.29         | 7.51          |

**b** CXCR2 activity kinetics with CXCL7 and RCT001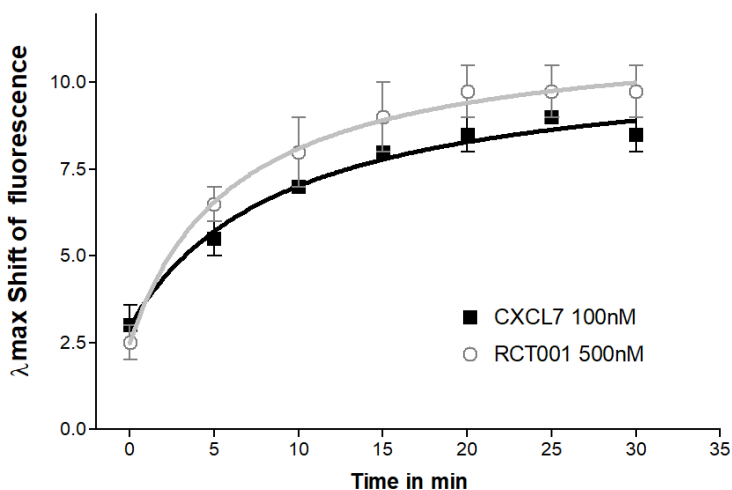

|                             | <b>CXCL7</b> | <b>RCT001</b> |
|-----------------------------|--------------|---------------|
| $\lambda_{\text{max}}$ (nm) | 7.74         | 8.38          |
| KD (min)                    | 9.06         | 7.51          |

**c** CXCR2 activity kinetics with CXCL8 and SX682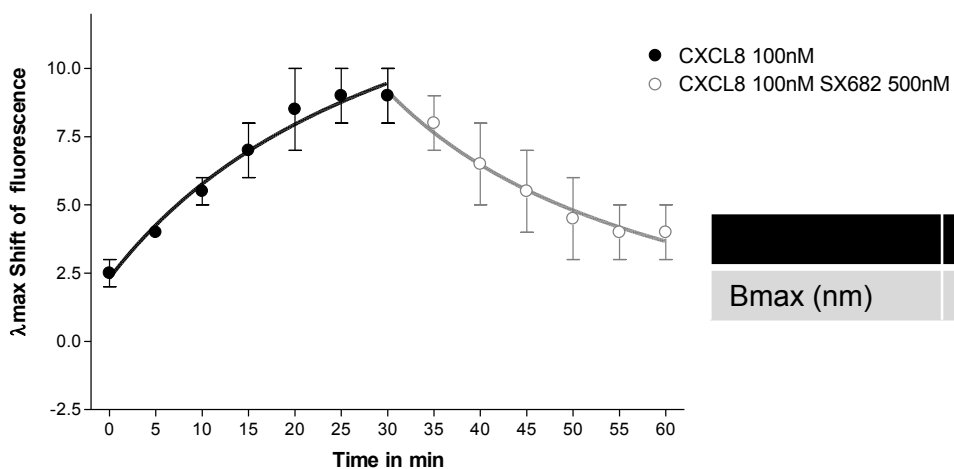

|           | <b>CXCL8</b> | <b>SX682</b> |
|-----------|--------------|--------------|
| Bmax (nm) | 15.38        | -11.49       |

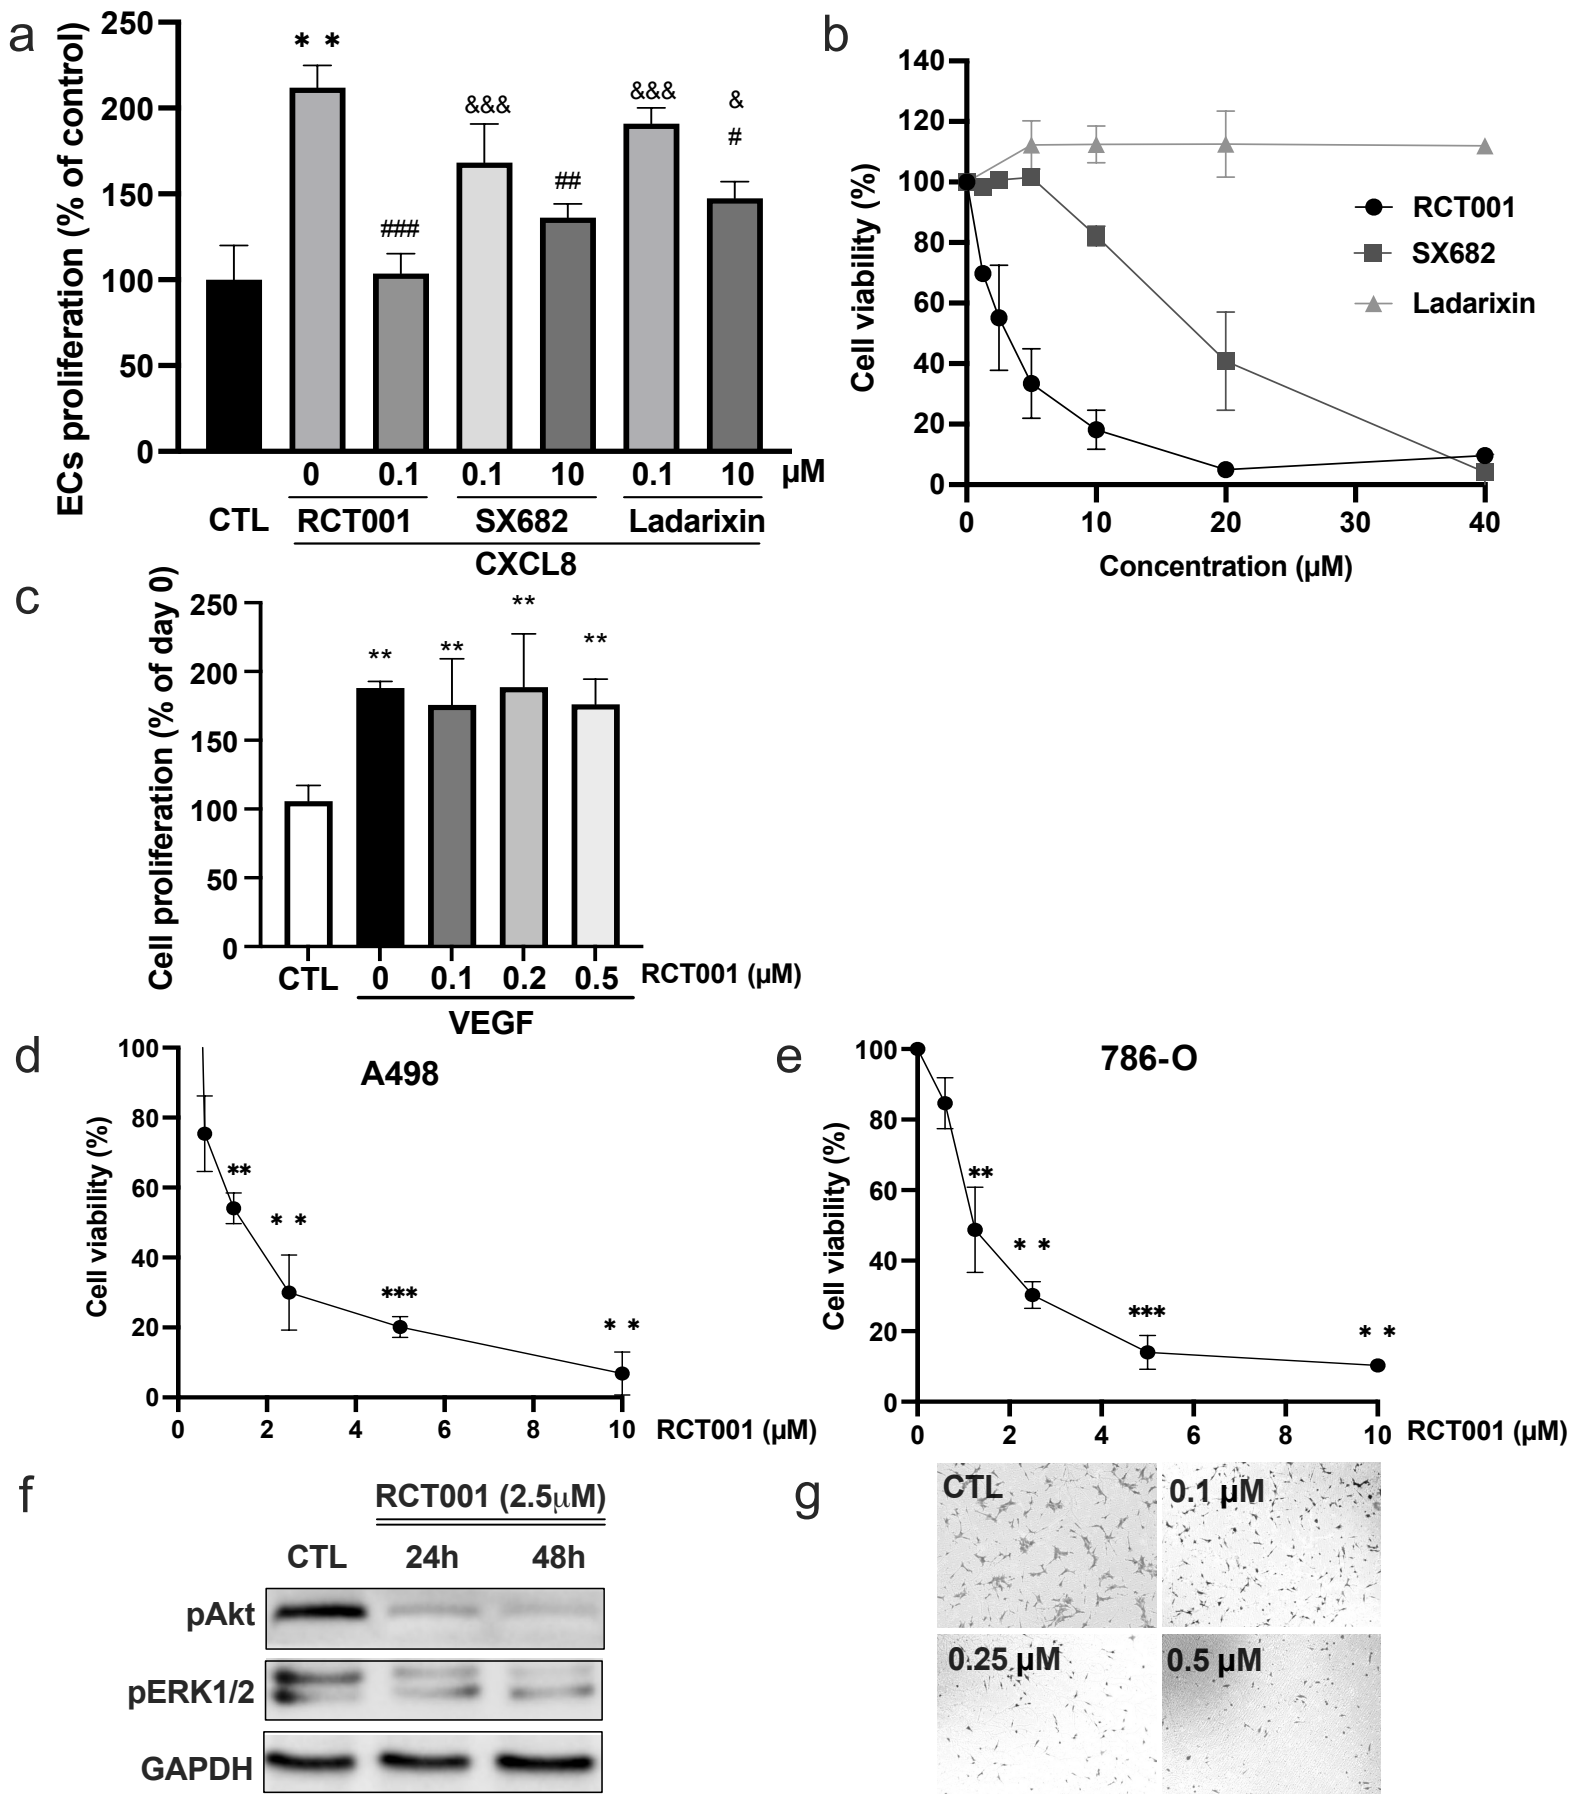

Supplementary Figure S4

**M0-like Macrophages**

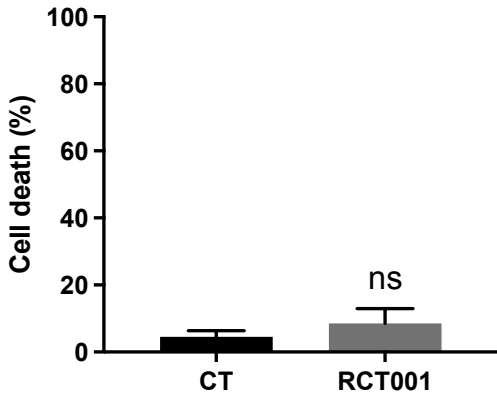

**M1-like Macrophages**

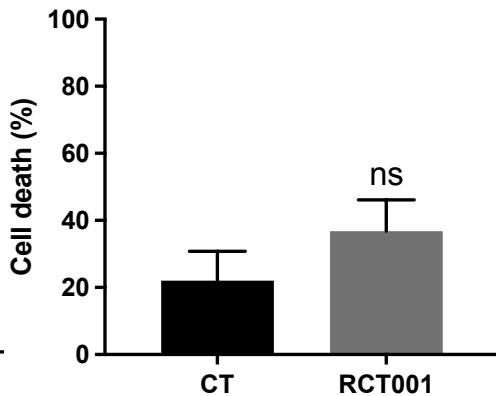

**M2-like Macrophages**

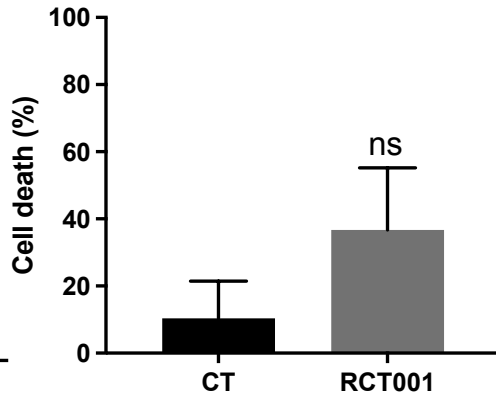

**Supplementary Figure S5**



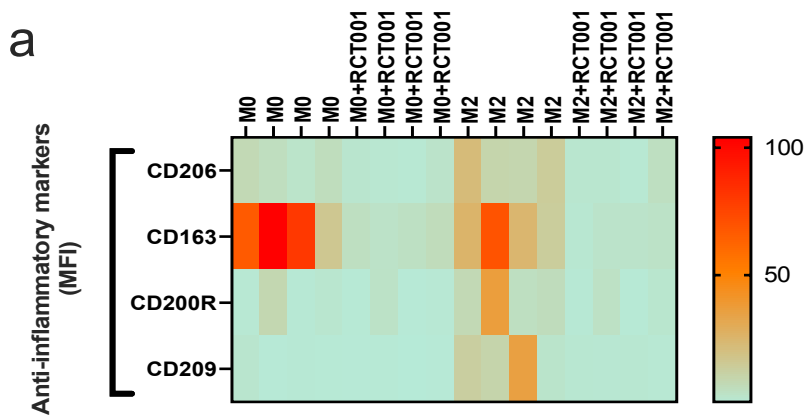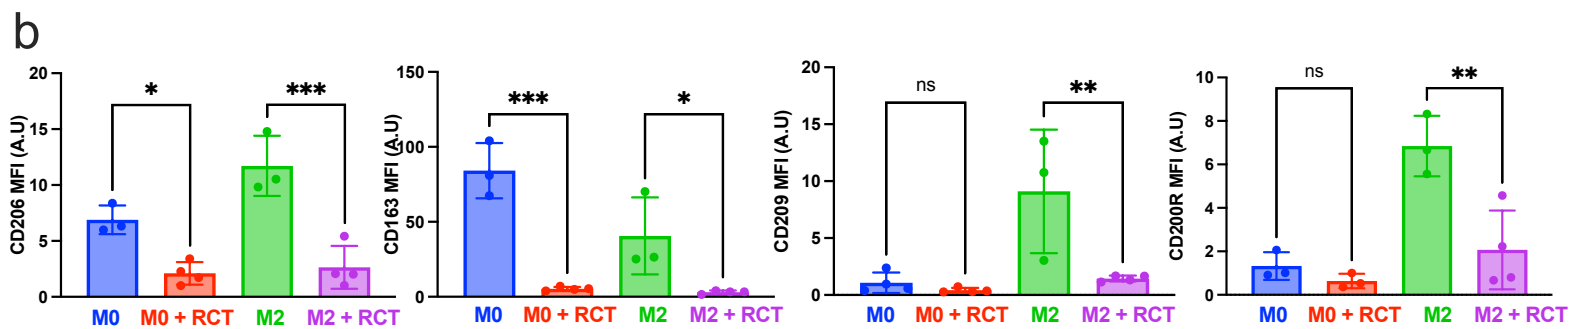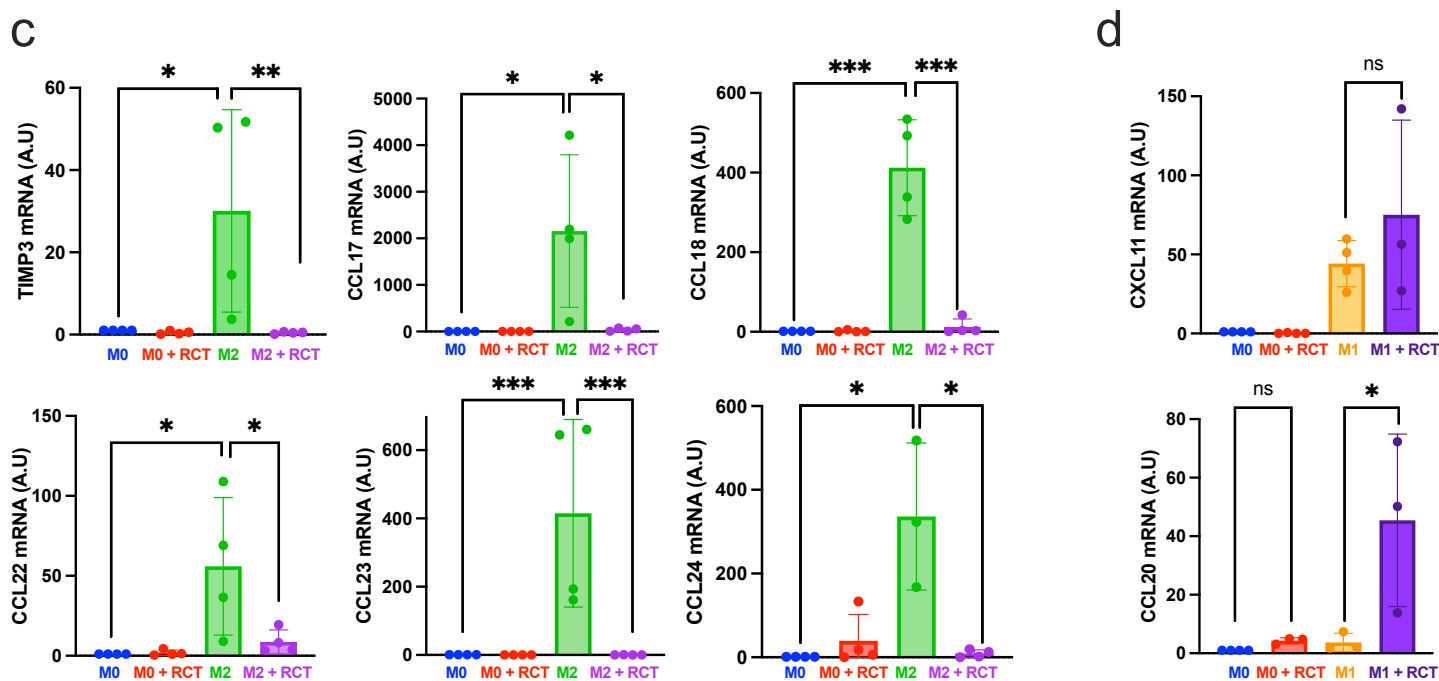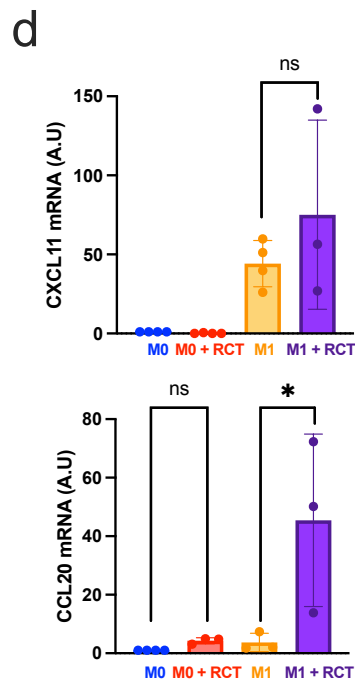

Supplementary Figure S6

## M2 Macrophages

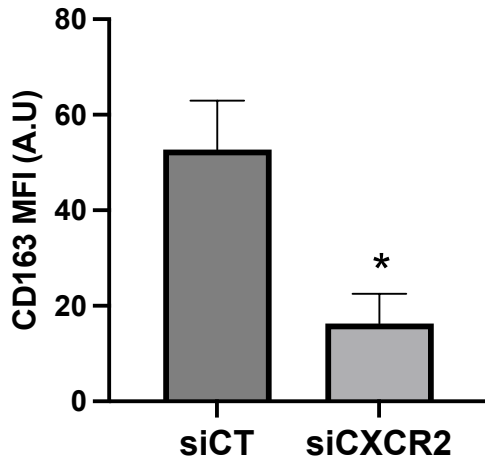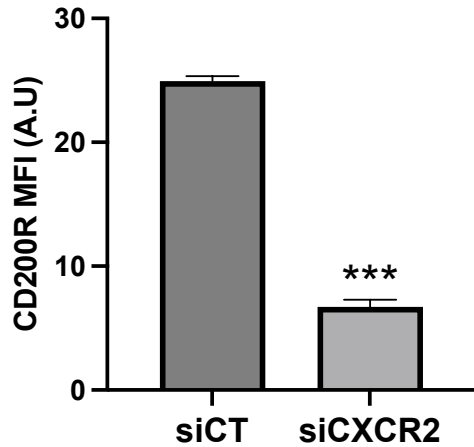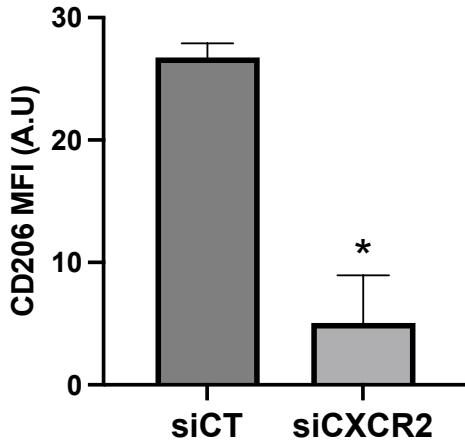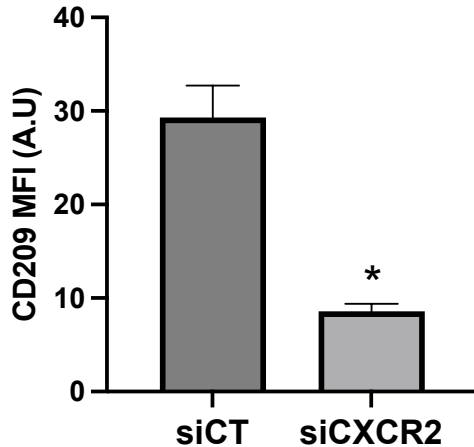

Supplementary Figure S7

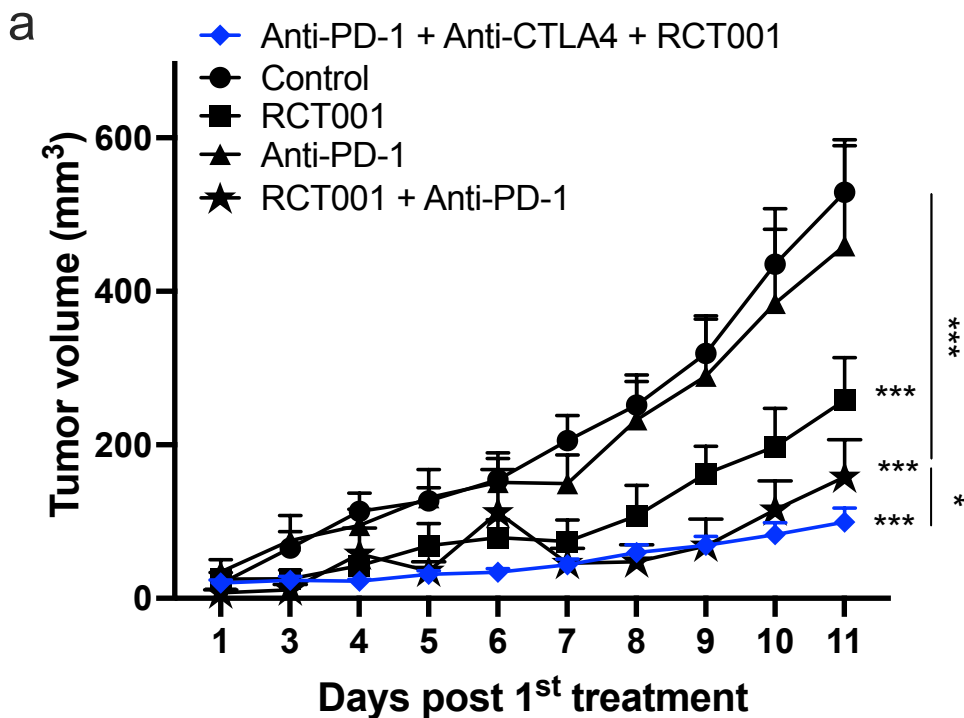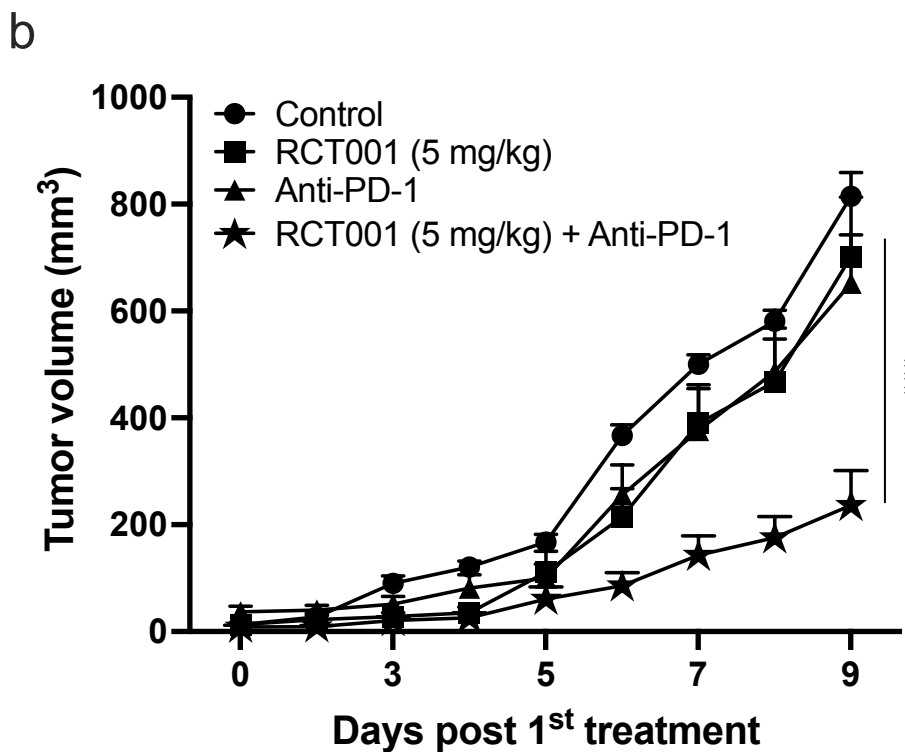

Supplement: 13046_2024_2984_MOESM1_ESM.pdf [file 13046_2024_2984_MOESM1_ESM.pdf]
